# Supplementary material for: Pressure-accelerated copper-free cycloaddition of azide and alkyne groups pre-organized in the crystalline state at room temperature
Source: Royal Society of Chemistry journal article supplement (doi:10.1039/c2gc36069a), 2012-01-01
Supplement: c2gc36069a.pdf [file c2gc36069a.pdf]

# *Supporting Information*

## **Pressure-accelerated copper-free cycloaddition of azide and alkyne pre-organized in crystalline state at room temperature**

Hao Chen, Ben-Bo Ni, Fan Gao, Yuguo Ma\*

*Beijing National Laboratory for Molecular Sciences (BNLMS), Key  
Lab of Polymer Chemistry & Physics of Ministry of Education, College  
of Chemistry, Peking University, Beijing 100871, China*

*Email: ygma@pku.edu.cn*

| <b>Table of Contents</b>                                                   | <b>Page</b> |
|----------------------------------------------------------------------------|-------------|
| 1. Experimental Section                                                    | <b>S2</b>   |
| 2. <sup>1</sup> H NMR, <sup>13</sup> C NMR and <sup>19</sup> F NMR spectra | <b>S4</b>   |
| 3. FT-IR and Raman Spectra                                                 | <b>S8</b>   |
| 4. X-ray Diffraction Pattern                                               | <b>S11</b>  |
| 5. Crystal Data and Structure Refinement                                   | <b>S15</b>  |

## 1. Experimental Section

**General Methods:** Chemicals were purchased commercially and used without further purification. All air and moisture sensitive reactions were performed under a nitrogen atmosphere using standard Schlenk techniques. Tetrahydrofuran (THF) was freshly distilled from sodium under N<sub>2</sub> prior to use. <sup>1</sup>H and <sup>19</sup>F NMR spectra were recorded on a Varian Mercury-300 (300 MHz) spectrometer using DMSO-*d*<sub>6</sub> as solvent. <sup>13</sup>C spectra were recorded on a Bruker-500 (500 MHz) spectrometer using DMSO-*d*<sub>6</sub> as solvent. Chemical shifts are reported in parts per million (ppm) and coupling constants are reported in hertz (Hz). <sup>1</sup>H NMR chemical shifts were referenced versus TMS (0 ppm), <sup>13</sup>C NMR chemical shifts were referenced versus DMSO-*d*<sub>6</sub> (39.52 ppm) and <sup>19</sup>F NMR chemical shifts were referenced versus a CF<sub>3</sub>CO<sub>2</sub>H external standard (0 ppm). Mass spectra were recorded on a VG ZAB-HS mass spectrometer. Elemental analysis was performed using an Elementar VARIO EL elemental analyzer. Infrared and Raman spectra were recorded in solid phase. Infrared spectra were recorded on a Bio-Rad FTS-65A FT-IR spectrometer. Raman spectra were recorded on a Micro-Raman system using a Renishaw System-1000 spectrometer with a 633 nm Yd-YAG laser, CCD detector, and 5x, 20x, 50x, and 80x objective lenses. X-ray diffraction data was collected on a PHILIPS X'Pert Pro diffractometer with an X'celerator detector in the reflection mode at 30 °C, using monochromatized Cu Kα radiation. Single crystal X-ray diffraction data were collected with a NONIUS KappaCCD diffractometer for **1**·**2** and **2**·**3**, with graphite monochromator and Mo Kα radiation [ $\lambda$  (MoKα) = 0.71073 Å]. Structures were solved by direct methods with

SHELXS-97 and refined against  $F^2$  with SHELXS-97. High pressure equipment used here were Atlas manual hydraulic press and 13 mm evacuable pellet die from Specac Company.

Compounds **1** and **2** were synthesized according to references.<sup>[1-2]</sup>

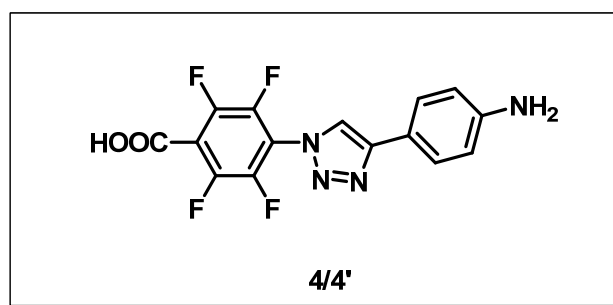

**4-(4-(4-Aminophenyl)-1H-1,2,3-triazol-1-yl)-2,3,5,6-tetrafluorobenzoic acid (4):**

130 mg (0.55 mmol) of **2**, 65 mg (0.55 mmol) of **1** were dissolved in 5 mL anhydrous THF. The solvent was removed under reduced pressure at room temperature to generate the yellow salt **1·2**. Then salt **1·2** was quickly put into a 13 mm evacuable pellet die and kept under 1 GPa pressure using hydraulic press overnight. The yellow salt changed into pale salt after the reaction. After washing with  $\text{CHCl}_3$  and acetone, 165 mg of **4** was collected and the yield was 85%.  $^1\text{H}$  NMR (300 MHz,  $\text{DMSO-}d_6$ , ppm):  $\delta$  8.82 (s, 1H,  $-\text{C}=\text{CH}-\text{N}-$ ), 7.64 (d, 2H,  $J = 8.4$ , Ar- $H$ ), 6.72 (d, 2H,  $J = 8.4$ , Ar- $H$ );  $^{13}\text{C}$  NMR (125 MHz,  $\text{DMSO-}d_6$ ):  $\delta$  159.9, 149.1, 148.3, 147.2, 145.2 ( $J_{\text{C-F}} = 250$  Hz), 142.7, 140.7 ( $J_{\text{C-F}} = 250$  Hz), 127.1, 122.2, 117.7, 117.4, 114.9, 109.1.  $^{19}\text{F}$  NMR (282 MHz,  $\text{DMSO-}d_6$ ):  $\delta$  -64.9, -74.7. MS (ESI,  $\text{C}_{15}\text{H}_5\text{D}_3\text{F}_4\text{N}_4\text{O}_2$ , solvent:  $\text{DMSO-}d_6$ ,  $m/z$ ): 355 ( $\text{M}^+$ ). HR-MS (ESI,  $\text{C}_{15}\text{H}_8\text{F}_4\text{N}_4\text{O}_2$ , solvent:  $\text{DMSO}$ ,  $m/z$ ): Anal. Calcd. for  $[(\text{M}+\text{H})^+]$ : 353.06561, Found 353.06515 $[(\text{M}+\text{H})^+]$ , Error: 0.5 mDa. Anal. Calcd. for  $\text{C}_{15}\text{H}_8\text{F}_4\text{N}_4\text{O}_2$ : C, 51.15; H, 2.29; N, 15.91. Found: C, 50.65; H, 2.43; N,

15.76.

**4-(4-(4-Aminophenyl)-1H-1,2,3-triazol-1-yl)-2,3,5,6-tetrafluorobenzoic acid (4')**:

A Schlenk tube was charged with 98 mg (0.8 mmol) of **1** and 235 mg (0.8 mmol) of **2**, 30 mg (0.16 mmol) of CuI, 15 mL of THF and 7 mL of diisopropylamine or triethylamine under nitrogen atmosphere. After stirred for 14 h at room temperature, the mixture was filtrated and the residue was washed with acetone and CH<sub>2</sub>Cl<sub>2</sub> to afford a pale solid as **4'** (105 mg, 32%).

**2. <sup>1</sup>H NMR, <sup>13</sup>C NMR and <sup>19</sup>F NMR spectra**

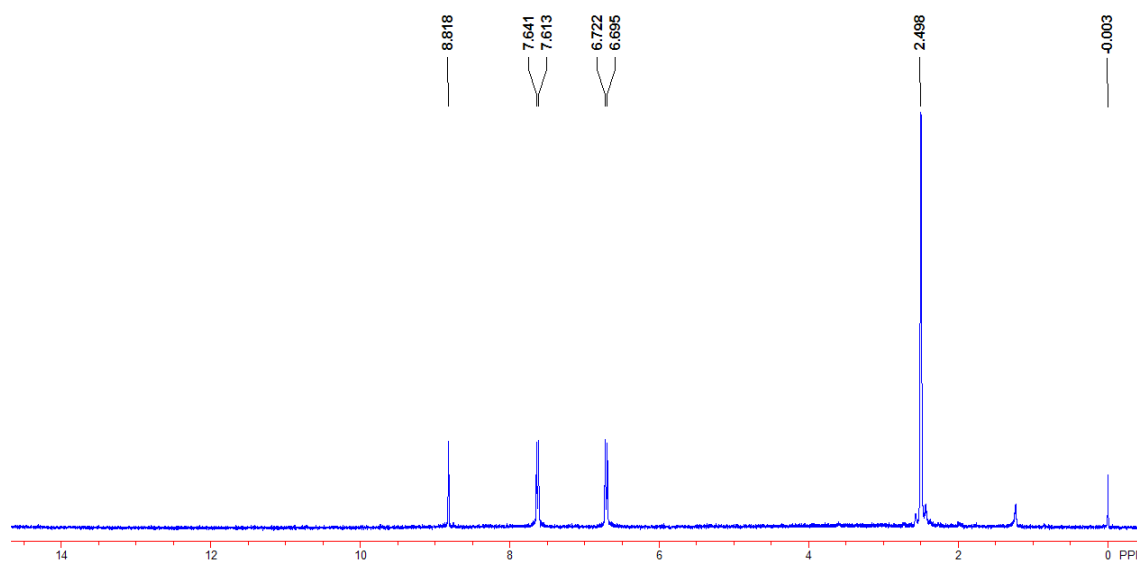

**Figure S1.** <sup>1</sup>H NMR spectrum of **4** in DMSO-*d*<sub>6</sub>

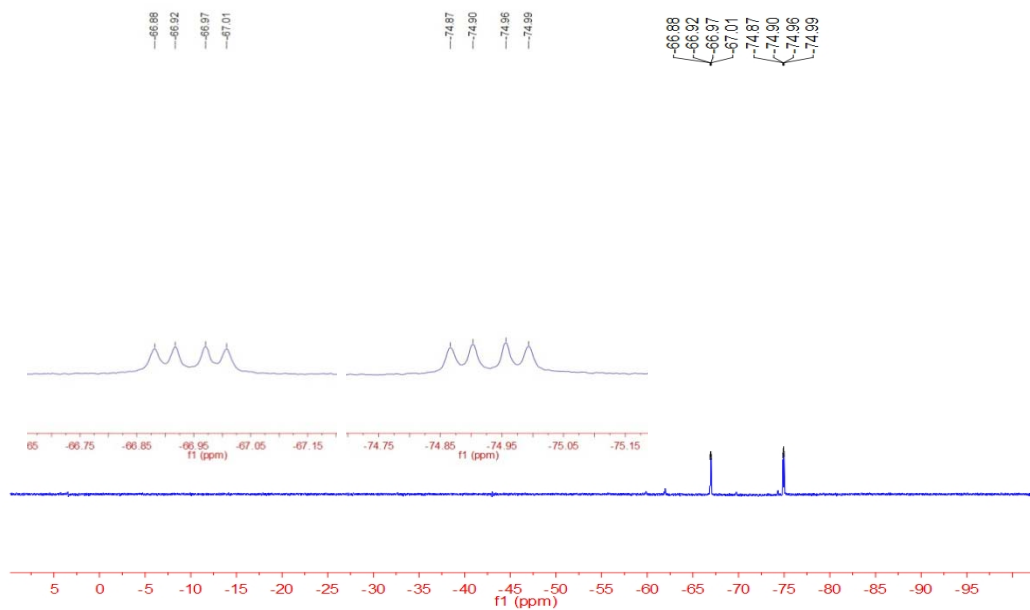

**Figure S2.**  $^{19}\text{F}$  NMR spectrum of **4** in  $\text{DMSO-}d_6$

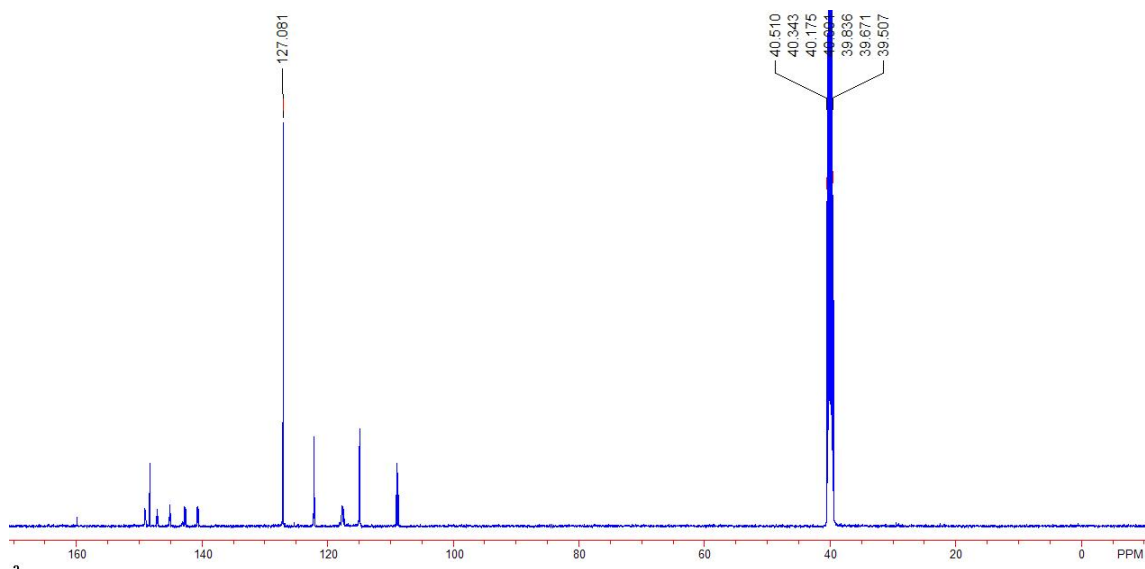

**Figure S3.**  $^{13}\text{C}$  NMR spectrum of **4** in  $\text{DMSO-}d_6$

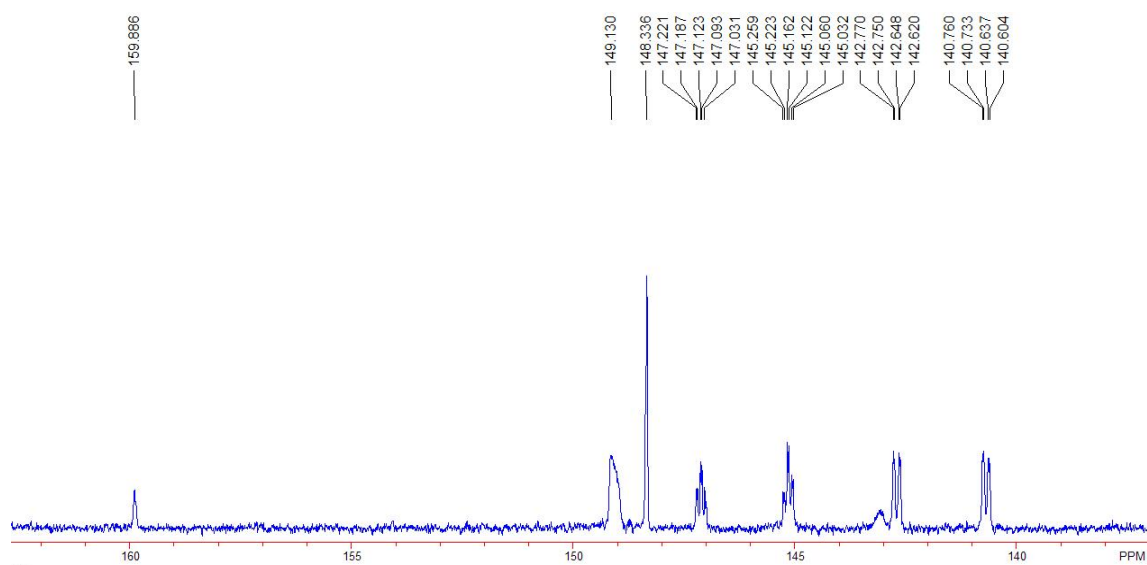

**Figure S4.** Partial  $^{13}\text{C}$  NMR spectrum of **4** in  $\text{DMSO-}d_6$  (from 135 to 165 ppm)

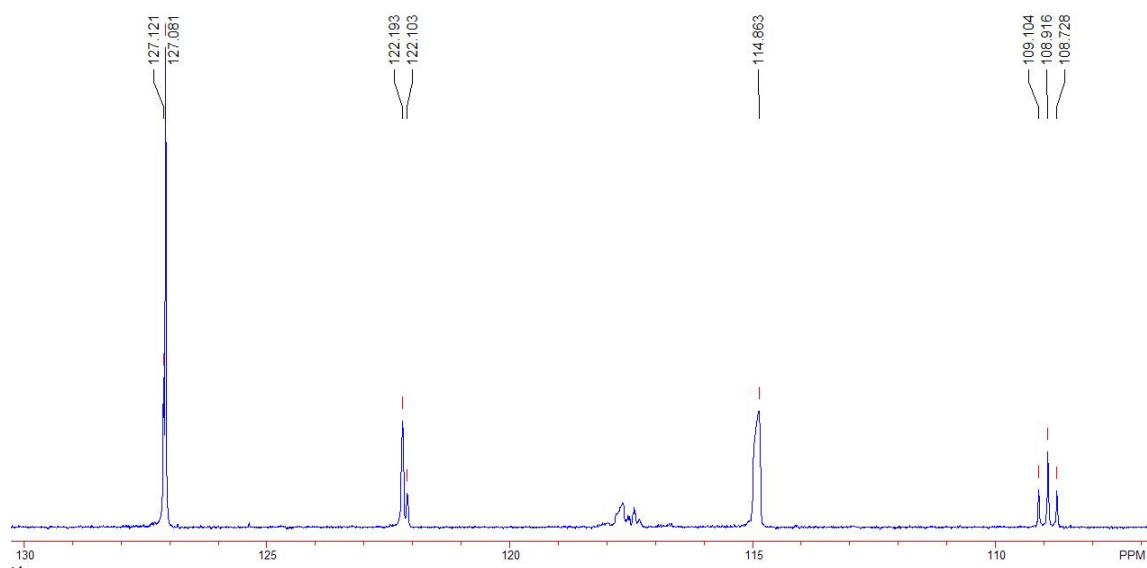

**Figure S5.** Partial  $^{13}\text{C}$  NMR spectrum of **4** in  $\text{DMSO-}d_6$  (from 105 to 130 ppm)

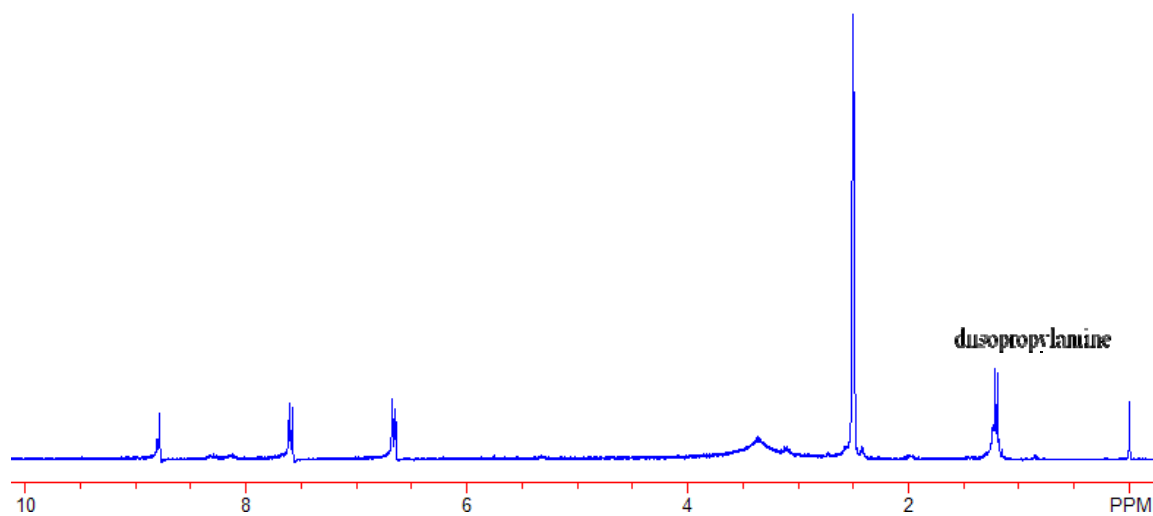

**Figure S6.** <sup>1</sup>H NMR spectrum of **4'** in DMSO-*d*<sub>6</sub>

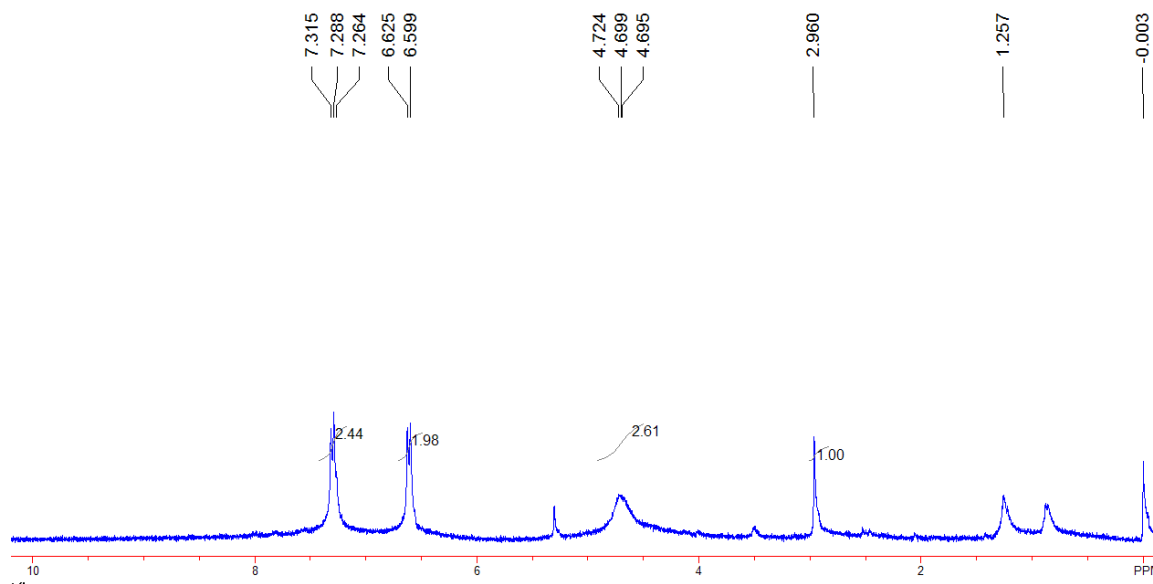

**Figure S7.** <sup>1</sup>H NMR spectrum of **1·2** in CDCl<sub>3</sub> before reaction

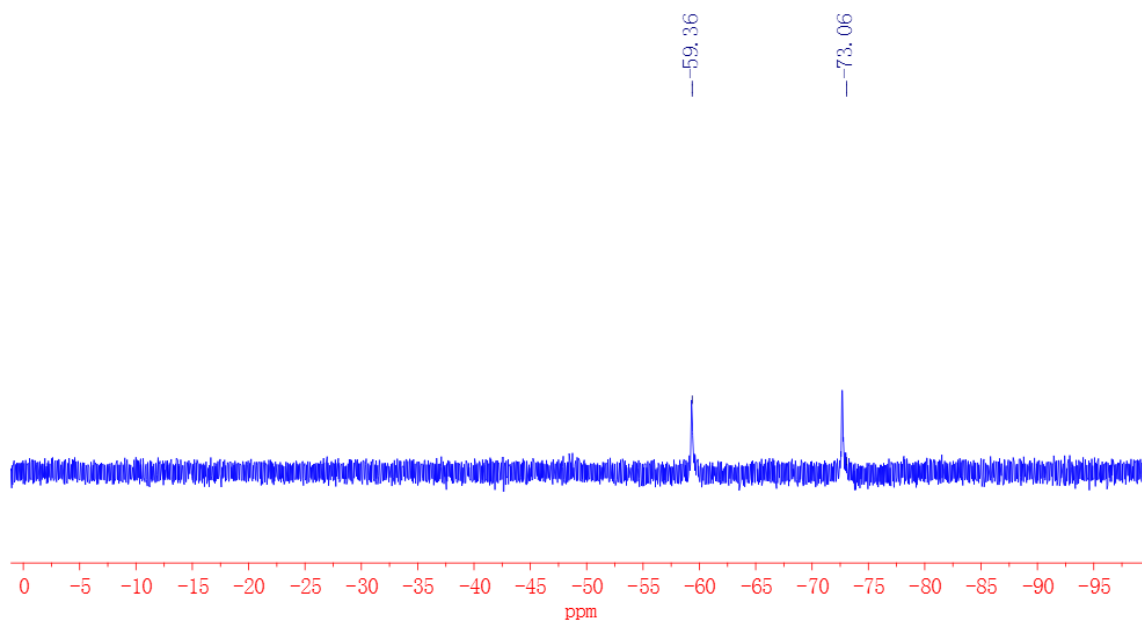

**Figure S8.**  $^{19}\text{F}$  NMR spectrum of **1·2** in  $\text{CDCl}_3$  before reaction

### 3. FT-IR and Raman Spectra

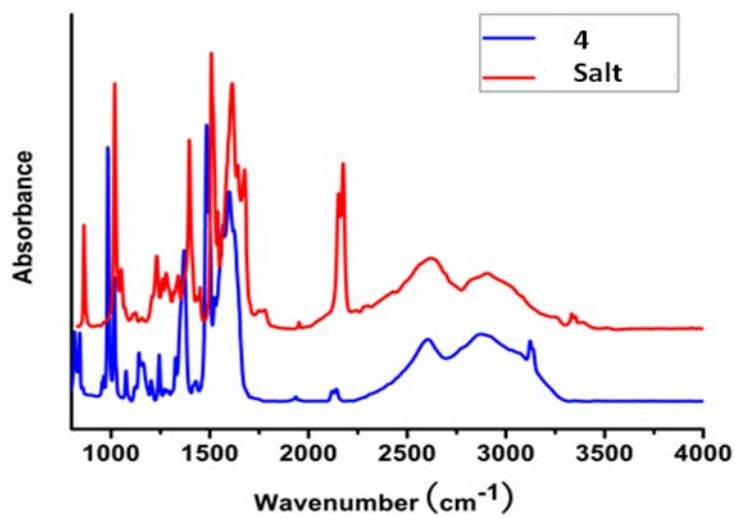



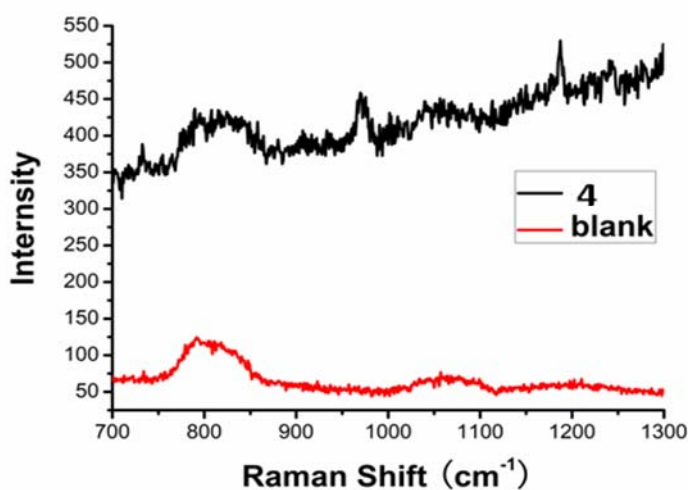

**Figure S9.** FT-IR spectra (top) and Raman spectra (bottom)

In the FT-IR spectra of both **4** and complex **1·2**, the peak at 1580 cm<sup>-1</sup> indicates that the carboxylic acid group is dissociated into the carboxylate anionic group. In the FT-IR spectrum of **4**, the band emerged at 840 cm<sup>-1</sup> can be assigned to triazole, and the signal at 2133 cm<sup>-1</sup> of azide stretching mode decreased in intensity significantly. Raman spectrum of **4** showed a characteristic band at 967 cm<sup>-1</sup>, which can be assigned as in-plane ring bending band of triazole ring. <sup>[3]</sup>

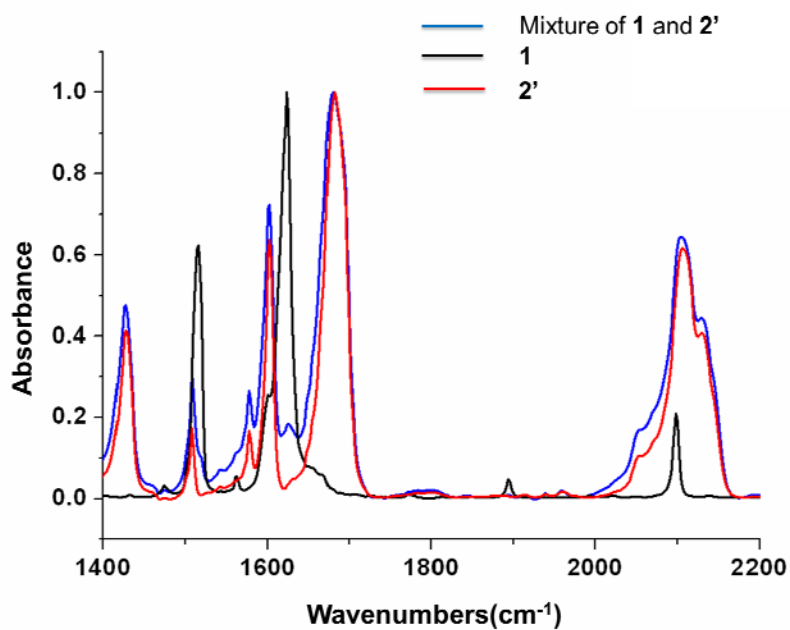

**Figure S10.** FT-IR in solid state: blue, black, red lines are corresponding to the mixture of **1** and **2'**, **1** and **2'**, respectively.

In the FT-IR spectra of both **2'** and the mixture of **1** and **2'**, the peak at  $1700\text{ cm}^{-1}$  indicates that the carboxylic acid group is not dissociated into the carboxylate anionic group because **2'** is less acidic than **2** due to the lack of fluorine substituents.

#### 4. X-ray Diffraction Patterns

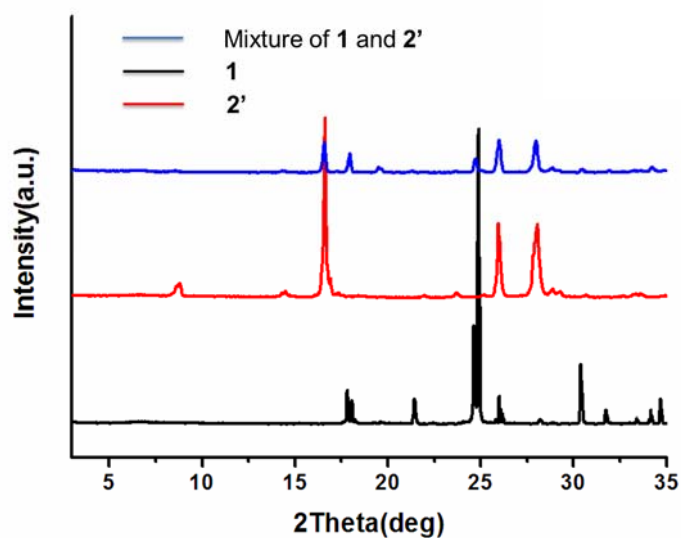

**Figure S11.** Powder X-ray diffraction: blue, black, red lines are corresponding to the mixture of **1** and **2'**, **1** and **2'**, respectively.

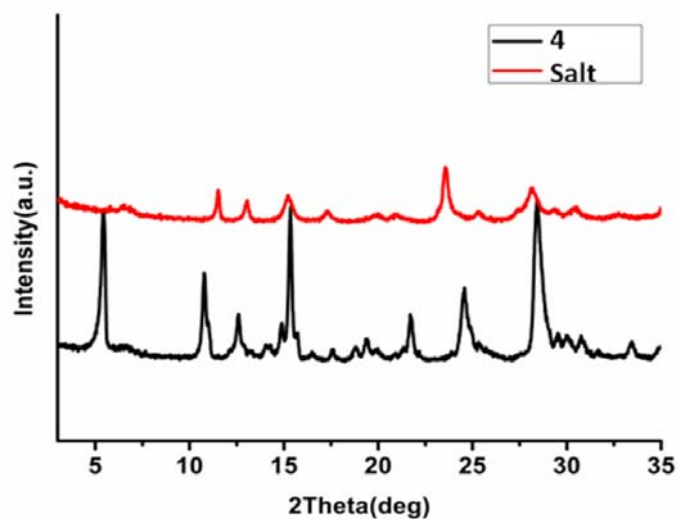

**Figure S12.** X-ray diffraction patterns of the salt **1·2** (top) and **4** (bottom)

XRD pattern of the salt shows multiple diffraction peaks in the  $2\theta$  range of 2 to 35

degree. The similarity of XRD patterns of **4** and salt **1·2** indicates that the crystal parameter did not change significantly after 1,3-dipolar cycloaddition in solid. The broad peak at ca.  $6^\circ$  is from aluminum foil.

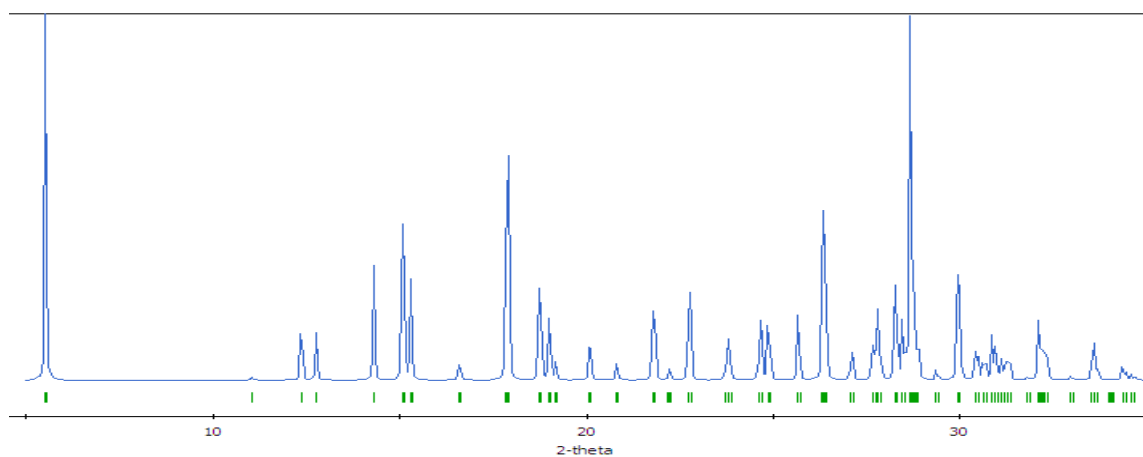

**Figure S13.** Simulated diffraction patterns of the salt **1·2** by Materials Studio program Package (version 5.0).

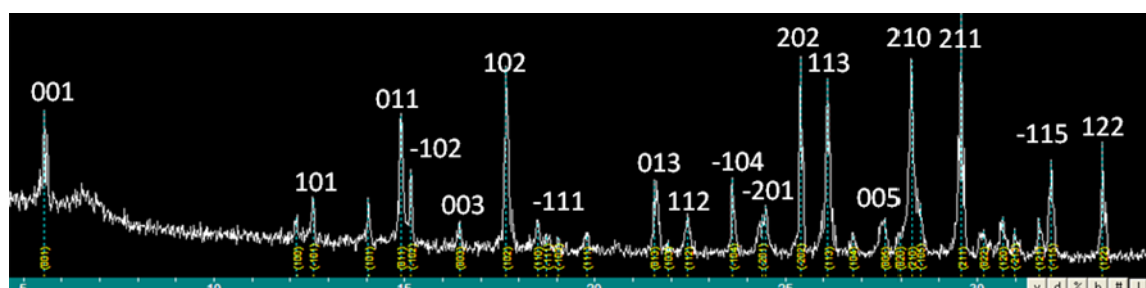

**Figure S14.** X-ray diffraction patterns of the salt **1·2**

The simulated diffraction patterns of crystal of **1·2** fits the experimental result well.

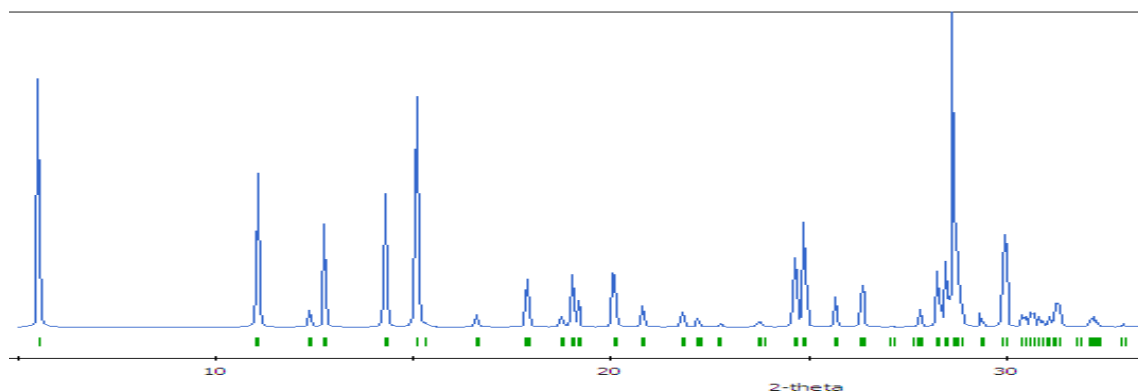

**Figure S15.** Simulated diffraction patterns of the salt **1·2** by Materials Studio program Package (version 5.0)

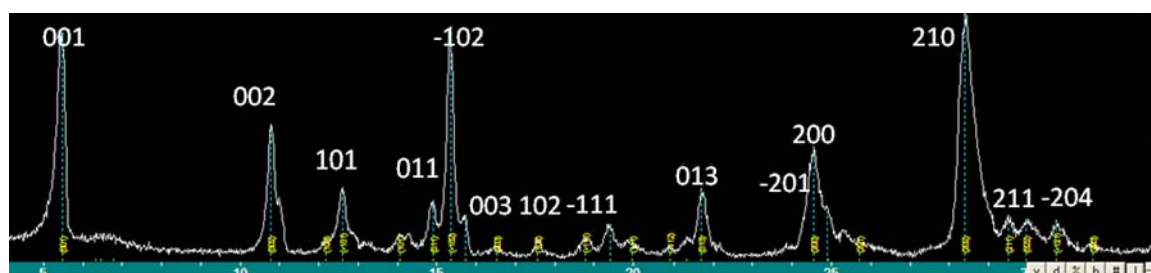

**Figure S16.** X-ray diffraction patterns of the salt **1·2**

The simulated diffraction patterns of crystal of **1·2** fits the experimental result well.

**Table S1.** The experimental Miller Indices and 2Theta of **1·2** and **1'·2**

| <b>h</b> | <b>k</b> | <b>l</b> | <b>2-Theta<br/>(1·2)</b> | <b>2-Theta<br/>(1'·2)</b> |
|----------|----------|----------|--------------------------|---------------------------|
| 0        | 0        | 1        | 5.49780                  | 5.47580                   |
| 1        | 0        | 1        | 14.0913                  | 14.1019                   |
| 0        | 1        | 1        | 14.8696                  | 14.9623                   |
| -1       | 0        | 2        | 15.2548                  | 15.1813                   |
| 0        | 0        | 3        | 16.5445                  | 16.4779                   |
| 1        | 0        | 2        | 17.5939                  | 17.5987                   |
| -1       | 1        | 1        | 18.7745                  | 18.8309                   |
| 0        | 1        | 3        | 21.6101                  | 21.6293                   |
| -2       | 0        | 1        | 24.3908                  | 24.3556                   |
| 2        | 1        | 1        | 29.5041                  | 29.5695                   |

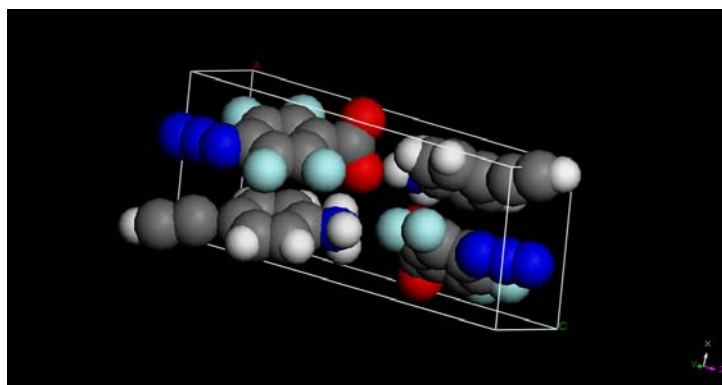

**Figure S17.** Crystal structure of the salt **1·2** using Materials Studio program Package (version 5.0) (CPK model)

## 5. Crystal Data and Structure Refinement

**Table S2-1.** Crystal data and structure refinement for **2·3**.

|                                   |                                                                                                                                  |
|-----------------------------------|----------------------------------------------------------------------------------------------------------------------------------|
| Identification code               | <b>2·3</b>                                                                                                                       |
| Empirical formula                 | C <sub>15</sub> H <sub>10</sub> F <sub>4</sub> N <sub>4</sub> O <sub>3</sub>                                                     |
| Formula weight                    | 370.27                                                                                                                           |
| Temperature                       | 173(2) K                                                                                                                         |
| Wavelength                        | 0.71073 Å                                                                                                                        |
| Crystal system, space group       | Triclinic, P-1                                                                                                                   |
| Unit cell dimensions              | a = 5.7206(11) Å    alpha = 86.60(3) deg.<br>b = 10.897(2) Å    beta = 84.86(3) deg.<br>c = 12.306(3) Å    gamma = 80.87(3) deg. |
| Volume                            | 753.5(3) Å <sup>3</sup>                                                                                                          |
| Z, Calculated density             | 2, 1.632 Mg/ m <sup>3</sup>                                                                                                      |
| Absorption coefficient            | 0.149 mm <sup>-1</sup>                                                                                                           |
| F(000)                            | 376                                                                                                                              |
| Crystal size                      | 0.36 x 0.23 x 0.13 mm                                                                                                            |
| Theta range for data collection   | 1.66 to 27.52 deg.                                                                                                               |
| Limiting indices                  | -7<=h<=7, -14<=k<=14, -15<=l<=15                                                                                                 |
| Reflections collected / unique    | 6742 / 3423 [R(int) = 0.0400]                                                                                                    |
| Completeness to theta = 27.52     | 99.0 %                                                                                                                           |
| Absorption correction             | Semi-empirical from equivalents                                                                                                  |
| Max. and min. transmission        | 1.0000 and 0.6893                                                                                                                |
| Refinement method                 | Full-matrix least-squares on F <sup>2</sup>                                                                                      |
| Data / restraints / parameters    | 3423 / 0 / 236                                                                                                                   |
| Goodness-of-fit on F <sup>2</sup> | 1.098                                                                                                                            |
| Final R indices [I>2sigma(I)]     | R1 = 0.0532, wR2 = 0.1303                                                                                                        |
| R indices (all data)              | R1 = 0.0604, wR2 = 0.1360                                                                                                        |
| Largest diff. peak and hole       | 0.314 and -0.254 e. Å <sup>-3</sup>                                                                                              |

**Table S2-2.** Atomic coordinates ( $\times 10^4$ ) and equivalent isotropic displacement parameters ( $\text{\AA}^2 \times 10^3$ ) for **2·3**. U(eq) is defined as one third of the trace of the orthogonalized Uij tensor.

|       | x        | y        | z       | U(eq) |
|-------|----------|----------|---------|-------|
| F(1)  | 9130(2)  | 8351(1)  | 3456(1) | 37(1) |
| F(2)  | 10813(2) | 6403(1)  | 2297(1) | 35(1) |
| F(3)  | 4039(2)  | 4562(1)  | 3545(1) | 37(1) |
| F(4)  | 2370(2)  | 6528(1)  | 4688(1) | 37(1) |
| O(1)  | 8141(2)  | 3231(1)  | 2585(1) | 42(1) |
| O(2)  | 9552(2)  | 4510(1)  | 1301(1) | 38(1) |
| O(3)  | 8917(2)  | 7399(1)  | -192(1) | 34(1) |
| N(1)  | 4988(3)  | 8615(1)  | 4651(1) | 37(1) |
| N(2)  | 3042(3)  | 8743(1)  | 5217(1) | 34(1) |
| N(3)  | 1391(3)  | 9022(2)  | 5755(2) | 46(1) |
| N(4)  | 3873(3)  | 11825(1) | 2696(1) | 35(1) |
| C(1)  | 5684(3)  | 7517(1)  | 4093(1) | 27(1) |
| C(2)  | 4465(3)  | 6510(1)  | 4096(1) | 27(1) |
| C(3)  | 5354(3)  | 5484(1)  | 3503(1) | 27(1) |
| C(4)  | 7497(3)  | 5394(1)  | 2861(1) | 25(1) |
| C(5)  | 8699(3)  | 6408(1)  | 2864(1) | 26(1) |
| C(6)  | 7843(3)  | 7426(1)  | 3468(1) | 27(1) |
| C(7)  | 8438(3)  | 4258(1)  | 2233(1) | 28(1) |
| C(8)  | 5218(3)  | 6664(2)  | 105(2)  | 34(1) |
| C(9)  | 6875(3)  | 7564(1)  | 262(1)  | 25(1) |
| C(10) | 6085(3)  | 8630(1)  | 933(1)  | 23(1) |
| C(11) | 3824(3)  | 8841(1)  | 1493(1) | 26(1) |
| C(12) | 3106(3)  | 9882(2)  | 2086(1) | 28(1) |
| C(13) | 4606(3)  | 10775(1) | 2131(1) | 26(1) |
| C(14) | 6883(3)  | 10563(1) | 1588(1) | 26(1) |
| C(15) | 7589(3)  | 9513(1)  | 1006(1) | 25(1) |



**Table S2-3.** Bond lengths [Å] and angles [deg] for **2•3**.

| Bond lengths [Å] | Angles [deg] |
|------------------|--------------|
| F(1)-C(6)        | 1.3376(17)   |
| F(2)-C(5)        | 1.3402(18)   |
| F(3)-C(3)        | 1.3429(17)   |
| F(4)-C(2)        | 1.3436(18)   |
| O(1)-C(7)        | 1.209(2)     |
| O(2)-C(7)        | 1.297(2)     |
| O(2)-H(2)        | 0.8399       |
| O(3)-C(9)        | 1.2395(19)   |
| N(1)-N(2)        | 1.252(2)     |
| N(1)-C(1)        | 1.400(2)     |
| N(2)-N(3)        | 1.115(2)     |
| N(4)-C(13)       | 1.363(2)     |
| N(4)-H(4B)       | 0.8600       |
| N(4)-H(4A)       | 0.8600       |
| C(1)-C(6)        | 1.388(2)     |
| C(1)-C(2)        | 1.390(2)     |
| C(2)-C(3)        | 1.375(2)     |
| C(3)-C(4)        | 1.390(2)     |
| C(4)-C(5)        | 1.391(2)     |
| C(4)-C(7)        | 1.499(2)     |
| C(5)-C(6)        | 1.373(2)     |
| C(8)-C(9)        | 1.499(2)     |
| C(8)-H(8C)       | 0.9800       |
| C(8)-H(8B)       | 0.9800       |
| C(8)-H(8A)       | 0.9800       |
| C(9)-C(10)       | 1.454(2)     |
| C(10)-C(15)      | 1.400(2)     |
| C(10)-C(11)      | 1.402(2)     |
| C(11)-C(12)      | 1.372(2)     |
| C(11)-H(11)      | 0.9500       |
| C(12)-C(13)      | 1.402(2)     |
| C(12)-H(12)      | 0.9500       |
| C(13)-C(14)      | 1.402(2)     |

---

| Bond lengths [Å] | Angles [deg] |
|------------------|--------------|
| C(14)-C(15)      | 1.372(2)     |
| C(14)-H(14)      | 0.9500       |
| C(15)-H(15)      | 0.9500       |
| C(7)-O(2)-H(2)   | 107.9        |
| N(2)-N(1)-C(1)   | 118.30(14)   |
| N(3)-N(2)-N(1)   | 169.73(18)   |
| C(13)-N(4)-H(4B) | 117.9        |
| C(13)-N(4)-H(4A) | 120.9        |
| H(4B)-N(4)-H(4A) | 120.3        |
| C(6)-C(1)-C(2)   | 116.49(14)   |
| C(6)-C(1)-N(1)   | 116.03(14)   |
| C(2)-C(1)-N(1)   | 127.48(15)   |
| F(4)-C(2)-C(3)   | 118.72(14)   |
| F(4)-C(2)-C(1)   | 119.81(13)   |
| C(3)-C(2)-C(1)   | 121.47(14)   |
| F(3)-C(3)-C(2)   | 117.27(14)   |
| F(3)-C(3)-C(4)   | 120.32(14)   |
| C(2)-C(3)-C(4)   | 122.39(14)   |
| C(3)-C(4)-C(5)   | 115.63(14)   |
| C(3)-C(4)-C(7)   | 121.27(14)   |
| C(5)-C(4)-C(7)   | 123.08(14)   |
| F(2)-C(5)-C(6)   | 117.10(14)   |
| F(2)-C(5)-C(4)   | 120.51(14)   |
| C(6)-C(5)-C(4)   | 122.35(14)   |
| F(1)-C(6)-C(5)   | 119.06(14)   |
| F(1)-C(6)-C(1)   | 119.29(14)   |
| C(5)-C(6)-C(1)   | 121.65(14)   |
| O(1)-C(7)-O(2)   | 125.40(15)   |
| O(1)-C(7)-C(4)   | 121.59(15)   |
| O(2)-C(7)-C(4)   | 113.01(13)   |
| C(9)-C(8)-H(8C)  | 109.5        |
| C(9)-C(8)-H(8B)  | 109.5        |
| H(8C)-C(8)-H(8B) | 109.5        |
| C(9)-C(8)-H      | 109.5        |

---

---

| Bond lengths [Å]  | Angles [deg] |
|-------------------|--------------|
| H(8C)-C(8)-H(8A)  | 109.5        |
| H(8B)-C(8)-H(8A)  | 109.5        |
| O(3)-C(9)-C(10)   | 120.22(14)   |
| O(3)-C(9)-C(8)    | 119.55(14)   |
| C(10)-C(9)-C(8)   | 120.23(13)   |
| C(15)-C(10)-C(11) | 117.66(14)   |
| C(15)-C(10)-C(9)  | 119.62(13)   |
| C(11)-C(10)-C(9)  | 122.70(14)   |
| C(12)-C(11)-C(10) | 121.11(14)   |
| C(12)-C(11)-H(11) | 119.4        |
| C(10)-C(11)-H(11) | 119.4        |
| C(11)-C(12)-C(13) | 120.72(14)   |
| C(11)-C(12)-H(12) | 119.6        |
| C(13)-C(12)-H(12) | 119.6        |
| N(4)-C(13)-C(14)  | 120.57(14)   |
| N(4)-C(13)-C(12)  | 120.82(14)   |
| C(14)-C(13)-C(12) | 118.62(14)   |
| C(15)-C(14)-C(13) | 120.09(14)   |
| C(15)-C(14)-H(14) | 120.0        |
| C(13)-C(14)-H(14) | 120.0        |
| C(14)-C(15)-C(10) | 121.78(14)   |
| C(14)-C(15)-H(15) | 119.1        |
| C(10)-C(15)-H(15) | 119.1        |

---

**Table S2-4.** Anisotropic displacement parameters ( $\text{\AA}^2 \times 10^3$ ) for **2·3**. The anisotropic displacement factor exponent takes the form:  $-2 \pi^2 [h^2 a^{*2} U^{11} + \dots + 2 h k a^* b^* U^{12}]$

|       | U11   | U22   | U33   | U23    | U13   | U12    |
|-------|-------|-------|-------|--------|-------|--------|
| F(1)  | 47(1) | 27(1) | 40(1) | -8(1)  | 2(1)  | -16(1) |
| F(2)  | 31(1) | 33(1) | 41(1) | -9(1)  | 8(1)  | -10(1) |
| F(3)  | 33(1) | 31(1) | 49(1) | -11(1) | 6(1)  | -13(1) |
| F(4)  | 31(1) | 39(1) | 41(1) | -11(1) | 9(1)  | -5(1)  |
| O(1)  | 52(1) | 23(1) | 50(1) | -9(1)  | 11(1) | -7(1)  |
| O(2)  | 49(1) | 27(1) | 37(1) | -11(1) | 12(1) | -4(1)  |
| O(3)  | 31(1) | 31(1) | 39(1) | -14(1) | 6(1)  | -5(1)  |
| N(1)  | 46(1) | 30(1) | 35(1) | -13(1) | 6(1)  | -5(1)  |
| N(2)  | 46(1) | 25(1) | 30(1) | -6(1)  | -3(1) | 2(1)   |
| N(3)  | 51(1) | 36(1) | 48(1) | -14(1) | 9(1)  | 5(1)   |
| N(4)  | 34(1) | 31(1) | 41(1) | -14(1) | 2(1)  | -3(1)  |
| C(1)  | 35(1) | 21(1) | 23(1) | -5(1)  | -4(1) | 0(1)   |
| C(2)  | 26(1) | 29(1) | 25(1) | -4(1)  | 2(1)  | -1(1)  |
| C(3)  | 28(1) | 24(1) | 31(1) | -4(1)  | -3(1) | -7(1)  |
| C(4)  | 29(1) | 21(1) | 26(1) | -5(1)  | -2(1) | -2(1)  |
| C(5)  | 28(1) | 26(1) | 25(1) | -2(1)  | -1(1) | -4(1)  |
| C(6)  | 34(1) | 22(1) | 27(1) | -3(1)  | -4(1) | -8(1)  |
| C(7)  | 26(1) | 24(1) | 33(1) | -7(1)  | -1(1) | -2(1)  |
| C(8)  | 35(1) | 28(1) | 42(1) | -10(1) | -1(1) | -9(1)  |
| C(9)  | 28(1) | 24(1) | 24(1) | -2(1)  | -3(1) | -2(1)  |
| C(10) | 25(1) | 23(1) | 22(1) | -2(1)  | -2(1) | -3(1)  |
| C(11) | 23(1) | 27(1) | 30(1) | -3(1)  | 0(1)  | -8(1)  |
| C(12) | 24(1) | 30(1) | 30(1) | -4(1)  | 3(1)  | -4(1)  |
| C(13) | 28(1) | 26(1) | 22(1) | -4(1)  | -3(1) | 0(1)   |
| C(14) | 25(1) | 25(1) | 30(1) | -4(1)  | -3(1) | -6(1)  |
| C(15) | 22(1) | 27(1) | 27(1) | -3(1)  | 0(1)  | -4(1)  |

**Table S2-5.** Hydrogen coordinates ( $\times 10^4$ ) and isotropic displacement parameters ( $\text{\AA}^2 \times 10^3$ ) for **2•3**.

|       | x     | y     | z    | U(eq) |
|-------|-------|-------|------|-------|
| H(2)  | 10013 | 3838  | 992  | 46    |
| H(4B) | 4808  | 12373 | 2667 | 42    |
| H(4A) | 2432  | 11996 | 2974 | 42    |
| H(8C) | 3762  | 7115  | -180 | 51    |
| H(8B) | 4823  | 6242  | 807  | 51    |
| H(8A) | 5987  | 6047  | -414 | 51    |
| H(11) | 2772  | 8254  | 1463 | 32    |
| H(12) | 1576  | 9998  | 2469 | 33    |
| H(14) | 7940  | 11147 | 1623 | 31    |
| H(15) | 9139  | 9382  | 644  | 30    |

**Table S2-6.** Torsion angles [deg] for **2·3**.

|                         |             |
|-------------------------|-------------|
| C(1)-N(1)-N(2)-N(3)     | -180(1)     |
| N(2)-N(1)-C(1)-C(6)     | 179.38(16)  |
| N(2)-N(1)-C(1)-C(2)     | -0.8(3)     |
| C(6)-C(1)-C(2)-F(4)     | 179.58(14)  |
| N(1)-C(1)-C(2)-F(4)     | -0.2(3)     |
| C(6)-C(1)-C(2)-C(3)     | -0.4(2)     |
| N(1)-C(1)-C(2)-C(3)     | 179.75(16)  |
| F(4)-C(2)-C(3)-F(3)     | 0.8(2)      |
| C(1)-C(2)-C(3)-F(3)     | -179.18(14) |
| F(4)-C(2)-C(3)-C(4)     | 179.38(15)  |
| C(1)-C(2)-C(3)-C(4)     | -0.6(3)     |
| F(3)-C(3)-C(4)-C(5)     | 179.04(14)  |
| C(2)-C(3)-C(4)-C(5)     | 0.5(2)      |
| F(3)-C(3)-C(4)-C(7)     | -2.2(2)     |
| C(2)-C(3)-C(4)-C(7)     | 179.32(15)  |
| C(3)-C(4)-C(5)-F(2)     | 178.15(14)  |
| C(7)-C(4)-C(5)-F(2)     | -0.6(2)     |
| C(3)-C(4)-C(5)-C(6)     | 0.6(2)      |
| C(7)-C(4)-C(5)-C(6)     | -178.15(15) |
| F(2)-C(5)-C(6)-F(1)     | 0.4(2)      |
| C(4)-C(5)-C(6)-F(1)     | 178.03(14)  |
| F(2)-C(5)-C(6)-C(1)     | -179.32(14) |
| C(4)-C(5)-C(6)-C(1)     | -1.7(3)     |
| C(2)-C(1)-C(6)-F(1)     | -178.19(14) |
| N(1)-C(1)-C(6)-F(1)     | 1.7(2)      |
| C(2)-C(1)-C(6)-C(5)     | 1.6(2)      |
| N(1)-C(1)-C(6)-C(5)     | -178.60(15) |
| C(3)-C(4)-C(7)-O(1)     | -34.8(2)    |
| C(5)-C(4)-C(7)-O(1)     | 143.86(18)  |
| C(3)-C(4)-C(7)-O(2)     | 144.81(16)  |
| C(5)-C(4)-C(7)-O(2)     | -36.5(2)    |
| O(3)-C(9)-C(10)-C(15)   | 4.2(2)      |
| C(8)-C(9)-C(10)-C(15)   | -175.28(15) |
| O(3)-C(9)-C(10)-C(11)   | -177.85(15) |
| C(8)-C(9)-C(10)-C(11)   | 2.7(2)      |
| C(15)-C(10)-C(11)-C(12) | 0.5(2)      |

---

|                         |             |
|-------------------------|-------------|
| C(9)-C(10)-C(11)-C(12)  | -177.51(15) |
| C(10)-C(11)-C(12)-C(13) | 1.1(3)      |
| C(11)-C(12)-C(13)-N(4)  | 178.32(15)  |
| C(11)-C(12)-C(13)-C(14) | -2.1(2)     |
| N(4)-C(13)-C(14)-C(15)  | -178.92(15) |
| C(12)-C(13)-C(14)-C(15) | 1.5(2)      |
| C(13)-C(14)-C(15)-C(10) | 0.1(2)      |
| C(11)-C(10)-C(15)-C(14) | -1.1(2)     |
| C(9)-C(10)-C(15)-C(14)  | 176.97(15)  |

---

**Table S2-7.** Hydrogen bonds for **2·3** [Å and deg.].

---

| D-H...A             | d(D-H) | d(H...A) | d(D...A)   | <(DHA) |
|---------------------|--------|----------|------------|--------|
| O(2)-H(2)...O(3)#1  | 0.84   | 1.72     | 2.5509(17) | 171.3  |
| N(4)-H(4B)...O(1)#2 | 0.86   | 2.24     | 3.071(2)   | 161.0  |

---

**Table S3-1.** Crystal data and structure refinement for **1'·2**.

|                                   |                                                                                                                        |
|-----------------------------------|------------------------------------------------------------------------------------------------------------------------|
| Identification code               | <b>1'·2</b>                                                                                                            |
| Empirical formula                 | C <sub>13</sub> H <sub>7</sub> F <sub>4</sub> IN <sub>4</sub> O <sub>2</sub>                                           |
| Formula weight                    | 454.13                                                                                                                 |
| Temperature                       | 173(2) K                                                                                                               |
| Wavelength                        | 0.71073 Å                                                                                                              |
| Crystal system, space group       | Monoclinic, P2(1)                                                                                                      |
| Unit cell dimensions              | a = 7.2406(14) Å    alpha = 90 deg.<br>b = 6.3111(11) Å    beta = 98.719(7) deg.<br>c = 16.211(3) Å    gamma = 90 deg. |
| Volume                            | 732.2(2) Å <sup>3</sup>                                                                                                |
| Z, Calculated density             | 2, 2.060 Mg/m <sup>3</sup>                                                                                             |
| Absorption coefficient            | 2.249 mm <sup>-1</sup>                                                                                                 |
| F(000)                            | 436                                                                                                                    |
| Crystal size                      | 0.49 x 0.30 x 0.08 mm <sup>3</sup>                                                                                     |
| Theta range for data collection   | 2.85 to 27.48 deg.                                                                                                     |
| Limiting indices                  | -9<=h<=9, -8<=k<=8, -19<=l<=21                                                                                         |
| Reflections collected / unique    | 5741 / 3087 [R(int) = 0.0264]                                                                                          |
| Completeness to theta = 27.48     | 99.2 %                                                                                                                 |
| Absorption correction             | Semi-empirical from equivalents                                                                                        |
| Max. and min. transmission        | 0.8406 and 0.4054                                                                                                      |
| Refinement method                 | Full-matrix least-squares on F <sup>2</sup>                                                                            |
| Data / restraints / parameters    | 3087 / 1 / 217                                                                                                         |
| Goodness-of-fit on F <sup>2</sup> | 1.051                                                                                                                  |
| Final R indices [I>2sigma(I)]     | R1 = 0.0261, wR2 = 0.0618                                                                                              |
| R indices (all data)              | R1 = 0.0265, wR2 = 0.0621                                                                                              |
| Absolute structure parameter      | -0.018(18)                                                                                                             |
| Largest diff. peak and hole       | 0.868 and -0.520 e. Å <sup>-3</sup>                                                                                    |



**Table S3-2.** Atomic coordinates ( $\times 10^4$ ) and equivalent isotropic displacement parameters ( $\text{\AA}^2 \times 10^3$ ) for **1'·2**.  $U(\text{eq})$  is defined as one third of the trace of the orthogonalized  $U_{ij}$  tensor.

|       | x       | y         | z       | $U(\text{eq})$ |
|-------|---------|-----------|---------|----------------|
| I(1)  | 1225(1) | 10877(1)  | 701(1)  | 40(1)          |
| F(1)  | 5666(3) | 12323(3)  | 2960(1) | 27(1)          |
| F(2)  | 6413(3) | 9716(3)   | 4251(1) | 26(1)          |
| F(3)  | 8616(3) | 4605(3)   | 2506(1) | 26(1)          |
| F(4)  | 7757(3) | 7171(4)   | 1208(1) | 30(1)          |
| O(1)  | 6505(3) | 5151(4)   | 4523(2) | 25(1)          |
| O(2)  | 9498(3) | 4777(4)   | 4361(2) | 31(1)          |
| N(1)  | 6225(4) | 11343(5)  | 1410(2) | 29(1)          |
| N(2)  | 6166(3) | 10808(13) | 667(2)  | 29(1)          |
| N(3)  | 6016(5) | 10602(9)  | -26(2)  | 41(1)          |
| N(4)  | 2832(4) | 6951(5)   | 4312(2) | 22(1)          |
| C(1)  | 6696(4) | 9844(5)   | 2041(2) | 20(1)          |
| C(2)  | 6402(4) | 10424(5)  | 2843(2) | 20(1)          |
| C(3)  | 6812(4) | 9054(5)   | 3507(2) | 20(1)          |
| C(4)  | 7555(4) | 7052(5)   | 3435(2) | 20(1)          |
| C(5)  | 7887(4) | 6509(5)   | 2638(2) | 21(1)          |
| C(6)  | 7440(4) | 7834(5)   | 1962(2) | 21(1)          |
| C(7)  | 7911(4) | 5529(5)   | 4171(2) | 20(1)          |
| C(8)  | 1765(4) | 9534(6)   | 1897(2) | 24(1)          |
| C(9)  | 1417(4) | 10738(8)  | 2569(2) | 25(1)          |
| C(10) | 1774(4) | 9894(6)   | 3372(2) | 23(1)          |
| C(11) | 2462(4) | 7855(5)   | 3476(2) | 20(1)          |
| C(12) | 2789(4) | 6638(5)   | 2803(2) | 21(1)          |
| C(13) | 2438(4) | 7479(6)   | 2003(2) | 24(1)          |

**Table S3-3.** Bond lengths [Å] and angles [deg] for **1'·2**.

| Bond lengths [Å] | Angles [deg] |
|------------------|--------------|
| I(1)-C(8)        | 2.098(3)     |
| F(1)-C(2)        | 1.337(4)     |
| F(2)-C(3)        | 1.349(4)     |
| F(3)-C(5)        | 1.343(4)     |
| F(4)-C(6)        | 1.344(4)     |
| O(1)-C(7)        | 1.263(4)     |
| O(2)-C(7)        | 1.239(4)     |
| N(1)-N(2)        | 1.246(4)     |
| N(1)-C(1)        | 1.396(4)     |
| N(2)-N(3)        | 1.120(4)     |
| N(4)-C(11)       | 1.458(4)     |
| N(4)-H(4A)       | 0.9100       |
| N(4)-H(4C)       | 0.9100       |
| N(4)-H(4B)       | 0.9100       |
| C(1)-C(6)        | 1.392(5)     |
| C(1)-C(2)        | 1.398(4)     |
| C(2)-C(3)        | 1.377(5)     |
| C(3)-C(4)        | 1.385(5)     |
| C(4)-C(5)        | 1.392(5)     |
| C(4)-C(7)        | 1.524(5)     |
| C(5)-C(6)        | 1.377(5)     |
| C(8)-C(9)        | 1.383(5)     |
| C(8)-C(13)       | 1.387(5)     |
| C(9)-C(10)       | 1.393(5)     |
| C(9)-H(9)        | 0.9500       |
| C(10)-C(11)      | 1.381(5)     |
| C(10)-H(10)      | 0.9500       |
| C(11)-C(12)      | 1.382(5)     |
| C(12)-C(13)      | 1.389(5)     |
| C(12)-H(12)      | 0.9500       |
| C(13)-H(13)      | 0.9500       |
| N(2)-N(1)-C(1)   | 119.5(5)     |
| N(3)-N(2)-N(1)   | 170.3(8)     |

---

| Bond lengths [Å] | Angles [deg] |
|------------------|--------------|
| C(11)-N(4)-H(4A) | 94.5         |
| C(11)-N(4)-H(4C) | 112.7        |
| H(4A)-N(4)-H(4C) | 118.8        |
| C(11)-N(4)-H(4B) | 108.7        |
| H(4A)-N(4)-H(4B) | 113.5        |
| H(4C)-N(4)-H(4B) | 107.8        |
| C(6)-C(1)-N(1)   | 127.3(3)     |
| C(6)-C(1)-C(2)   | 116.0(3)     |
| N(1)-C(1)-C(2)   | 116.7(3)     |
| F(1)-C(2)-C(3)   | 119.7(3)     |
| F(1)-C(2)-C(1)   | 119.1(3)     |
| C(3)-C(2)-C(1)   | 121.2(3)     |
| F(2)-C(3)-C(2)   | 117.0(3)     |
| F(2)-C(3)-C(4)   | 119.8(3)     |
| C(2)-C(3)-C(4)   | 123.2(3)     |
| C(3)-C(4)-C(5)   | 115.2(3)     |
| C(3)-C(4)-C(7)   | 122.1(3)     |
| C(5)-C(4)-C(7)   | 122.6(3)     |
| F(3)-C(5)-C(6)   | 117.9(3)     |
| F(3)-C(5)-C(4)   | 119.7(3)     |
| C(6)-C(5)-C(4)   | 122.4(3)     |
| F(4)-C(6)-C(5)   | 118.9(3)     |
| F(4)-C(6)-C(1)   | 119.2(3)     |
| C(5)-C(6)-C(1)   | 121.9(3)     |
| O(2)-C(7)-O(1)   | 126.6(3)     |
| O(2)-C(7)-C(4)   | 118.5(3)     |
| O(1)-C(7)-C(4)   | 114.9(3)     |
| C(9)-C(8)-C(13)  | 121.2(3)     |
| C(9)-C(8)-I(1)   | 118.4(3)     |
| C(13)-C(8)-I(1)  | 120.3(3)     |
| C(8)-C(9)-C(10)  | 119.7(4)     |
| C(8)-C(9)-H(9)   | 120.1        |
| C(10)-C(9)-H(9)  | 120.1        |
| C(11)-C(10)-C(9) | 118.9(3)     |

---

---

| Bond lengths [Å]  | Angles [deg] |
|-------------------|--------------|
| C(11)-C(10)-H(10) | 120.6        |
| C(9)-C(10)-H(10)  | 120.6        |
| C(10)-C(11)-C(12) | 121.6(3)     |
| C(10)-C(11)-N(4)  | 119.3(3)     |
| C(12)-C(11)-N(4)  | 119.1(3)     |
| C(11)-C(12)-C(13) | 119.7(3)     |
| C(11)-C(12)-H(12) | 120.2        |
| C(13)-C(12)-H(12) | 120.2        |
| C(8)-C(13)-C(12)  | 118.9(3)     |
| C(8)-C(13)-H(13)  | 120.5        |
| C(12)-C(13)-H(13) | 120.5        |

---

**Table S3-4.** Anisotropic displacement parameters ( $\text{\AA}^2 \times 10^3$ ) for **1'·2**. The anisotropic displacement factor exponent takes the form:  $-2 \pi^2 [h^2 a^{*2} U^{11} + \dots + 2 h k a^* b^* U^{12}]$

|       | U11   | U22   | U33   | U23   | U13   | U12   |
|-------|-------|-------|-------|-------|-------|-------|
| I(1)  | 30(1) | 59(1) | 30(1) | 20(1) | -3(1) | -8(1) |
| F(1)  | 28(1) | 16(1) | 40(1) | -1(1) | 10(1) | 4(1)  |
| F(2)  | 31(1) | 27(1) | 22(1) | -6(1) | 7(1)  | -1(1) |
| F(3)  | 29(1) | 17(1) | 36(1) | -4(1) | 13(1) | 5(1)  |
| F(4)  | 37(1) | 32(1) | 22(1) | -7(1) | 10(1) | 0(1)  |
| O(1)  | 21(1) | 30(1) | 24(1) | 6(1)  | 6(1)  | 2(1)  |
| O(2)  | 19(1) | 35(1) | 40(2) | 13(1) | 5(1)  | 0(1)  |
| N(1)  | 36(2) | 25(2) | 24(1) | 3(1)  | 2(1)  | 0(1)  |
| N(2)  | 24(1) | 36(2) | 28(1) | 9(2)  | 3(1)  | 0(2)  |
| N(3)  | 40(2) | 57(3) | 26(2) | 5(2)  | 6(1)  | 9(2)  |
| N(4)  | 21(1) | 23(1) | 21(1) | 1(1)  | 4(1)  | -2(1) |
| C(1)  | 19(1) | 22(2) | 20(2) | 1(1)  | 4(1)  | -3(1) |
| C(2)  | 19(1) | 18(2) | 24(2) | -5(1) | 4(1)  | -2(1) |
| C(3)  | 18(1) | 23(2) | 20(2) | -5(1) | 6(1)  | -2(1) |
| C(4)  | 15(1) | 22(2) | 22(2) | 0(1)  | 4(1)  | -3(1) |
| C(5)  | 19(1) | 15(2) | 29(2) | -3(1) | 6(1)  | -1(1) |
| C(6)  | 21(1) | 22(2) | 20(2) | -6(1) | 7(1)  | -3(1) |
| C(7)  | 21(1) | 17(2) | 22(1) | -2(1) | 2(1)  | -3(1) |
| C(8)  | 20(1) | 29(2) | 22(2) | 10(1) | -1(1) | -4(1) |
| C(9)  | 20(1) | 22(2) | 33(2) | 8(2)  | 0(1)  | 1(2)  |
| C(10) | 21(2) | 19(2) | 27(2) | -4(1) | 4(1)  | 1(1)  |
| C(11) | 16(1) | 22(2) | 21(2) | 2(1)  | 1(1)  | -3(1) |
| C(12) | 20(1) | 17(1) | 27(2) | -1(1) | 3(1)  | 1(1)  |
| C(13) | 22(2) | 26(2) | 22(2) | -3(1) | 5(1)  | -3(1) |

---

**Table S3-5.** Hydrogen coordinates ( $\times 10^4$ ) and isotropic displacement parameters ( $\text{\AA}^2 \times 10^3$ ) for **1'·2**.

---

|       | x    | y     | z    | U(eq) |
|-------|------|-------|------|-------|
| H(4A) | 3830 | 6173  | 4209 | 26    |
| H(4C) | 3008 | 7958  | 4719 | 26    |
| H(4B) | 1834 | 6150  | 4398 | 26    |
| H(9)  | 937  | 12135 | 2485 | 30    |
| H(10) | 1548 | 10707 | 3839 | 27    |
| H(12) | 3252 | 5234  | 2889 | 26    |
| H(13) | 2656 | 6660  | 1536 | 28    |

---

**Table S3-6.** Torsion angles [deg] for **1'·2**.

---

|                        |           |
|------------------------|-----------|
| C(1)-N(1)-N(2)-N(3)    | 173(3)    |
| N(2)-N(1)-C(1)-C(6)    | 12.0(5)   |
| N(2)-N(1)-C(1)-C(2)    | -168.4(3) |
| C(6)-C(1)-C(2)-F(1)    | -179.1(3) |
| N(1)-C(1)-C(2)-F(1)    | 1.3(4)    |
| C(6)-C(1)-C(2)-C(3)    | -0.8(4)   |
| N(1)-C(1)-C(2)-C(3)    | 179.6(3)  |
| F(1)-C(2)-C(3)-F(2)    | 0.9(4)    |
| C(1)-C(2)-C(3)-F(2)    | -177.4(3) |
| F(1)-C(2)-C(3)-C(4)    | 179.2(3)  |
| C(1)-C(2)-C(3)-C(4)    | 0.9(5)    |
| F(2)-C(3)-C(4)-C(5)    | 179.0(3)  |
| C(2)-C(3)-C(4)-C(5)    | 0.7(5)    |
| F(2)-C(3)-C(4)-C(7)    | 1.2(4)    |
| C(2)-C(3)-C(4)-C(7)    | -177.1(3) |
| C(3)-C(4)-C(5)-F(3)    | 179.6(3)  |
| C(7)-C(4)-C(5)-F(3)    | -2.6(4)   |
| C(3)-C(4)-C(5)-C(6)    | -2.4(5)   |
| C(7)-C(4)-C(5)-C(6)    | 175.3(3)  |
| F(3)-C(5)-C(6)-F(4)    | -0.2(4)   |
| C(4)-C(5)-C(6)-F(4)    | -178.2(3) |
| F(3)-C(5)-C(6)-C(1)    | -179.3(3) |
| C(4)-C(5)-C(6)-C(1)    | 2.7(5)    |
| N(1)-C(1)-C(6)-F(4)    | -0.6(5)   |
| C(2)-C(1)-C(6)-F(4)    | 179.9(3)  |
| N(1)-C(1)-C(6)-C(5)    | 178.6(3)  |
| C(2)-C(1)-C(6)-C(5)    | -1.0(5)   |
| C(3)-C(4)-C(7)-O(2)    | -125.5(4) |
| C(5)-C(4)-C(7)-O(2)    | 56.9(5)   |
| C(3)-C(4)-C(7)-O(1)    | 55.1(4)   |
| C(5)-C(4)-C(7)-O(1)    | -122.5(3) |
| C(13)-C(8)-C(9)-C(10)  | 1.0(5)    |
| I(1)-C(8)-C(9)-C(10)   | -179.6(2) |
| C(8)-C(9)-C(10)-C(11)  | -0.4(5)   |
| C(9)-C(10)-C(11)-C(12) | -0.5(5)   |
| C(9)-C(10)-C(11)-N(4)  | -179.7(3) |

|                         |          |
|-------------------------|----------|
| C(10)-C(11)-C(12)-C(13) | 0.6(5)   |
| N(4)-C(11)-C(12)-C(13)  | 179.8(3) |
| C(9)-C(8)-C(13)-C(12)   | -0.9(5)  |
| I(1)-C(8)-C(13)-C(12)   | 179.7(2) |
| C(11)-C(12)-C(13)-C(8)  | 0.1(5)   |

---

### References:

- [1] P. R. Serwinski and P. M. Lahti, *Org. Lett.* 2003, **5**, 2099
- [2] J. F. W. Keana and S. X. Cai, *J. Org. Chem.* 1990, **55**, 3640-3647
- [3] (a) C. Törnkvist, J. Bergman and B. Liedberg, *J. Phys. Chem.* 1991, **95**, 3119.  
(b) A. A. Jbarah, K. Banert and R. Holze, *Vib. Spectrosc.* 2007, **44**, 142.
